# Supplementary material for: Micronutrient Analysis of Gluten-Free Products: Their Low Content Is Not Involved in Gluten-Free Diet Imbalance in a Cohort of Celiac Children and Adolescent
Source: PubMed Central journal article supplement (PMC6723272; doi:10.3390/foods8080321), 2019-08-07
Supplement: foods-08-00321-s001.pdf [file foods-08-00321-s001.pdf]

Supplementary Materials

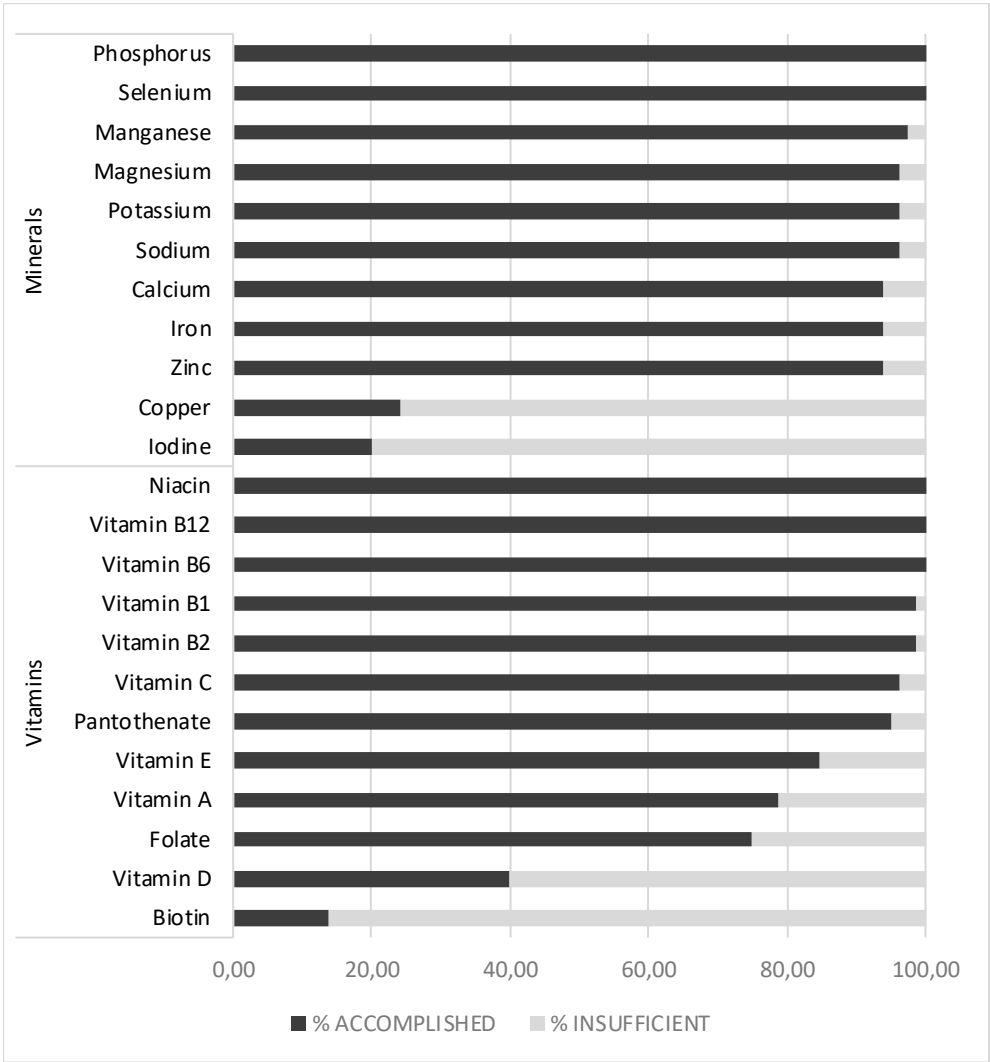

**Figure S1.** Percentage of celiac children and adolescents who accomplished or did not achieve 2/3 of the dietary reference intake of the vitamins and minerals (proposed by the Federation of Spanish Societies of Nutrition and Dietetics, FESNAD).

**Table S1.** Analyzed gluten free products and ingredients declared on the package label.

| Code             | Product                       | Ingredients                                                                                                                                                                                                                                                                                                                                              |
|------------------|-------------------------------|----------------------------------------------------------------------------------------------------------------------------------------------------------------------------------------------------------------------------------------------------------------------------------------------------------------------------------------------------------|
| Cereal Flakes 1  | Choco balls                   | Corn semolina 61%, whole cane sugar, bitter cocoa 8% (cocoa dough, whole cane sugar, cocoa butter), cocoa powder 5%, rice flour 4%, quinoa flour 4%, sea salt                                                                                                                                                                                            |
| Cereal Flakes 2  | Granola chocolate and almonds | Buckwheat and millet flakes 30%, sugar, rice flour, vegetable oil, corn flakes (corn flour, salt), chocolate 5% (sugar, cocoa paste, cocoa butter, emulsifier: soy lecithin, flavor), raisins (raisin, vegetable oil), puffed rice, coconut 3.5%, potato starch, almonds 2%, cocoa, antioxidant: ascorbic palmitate, tocopherols (natural), soy lecithin |
| Cereal Flakes 3  | Milly Magic                   | Corn semolina, sugar, cocoa powder 8%, iodized salt                                                                                                                                                                                                                                                                                                      |
| Cereal Flakes 4  | Choco bites                   | Cereals (54.6%) (whole rice flour, corn flour), sugar, skimmed cocoa powder (6.3%), rapeseed refined oil, hazelnuts (2.1%), lactose, palm oil, whey powder, sunflower refined oil, skimmed milk powder, emulsifier (sunflower lecithin), flavor                                                                                                          |
| Cereal Flakes 5  | Corn Flakes                   | Corn, sugar, salt, emulsifier: sunflower lecithin, vitamins: niacin, pantothenic acid, B6, riboflavin, thiamine, folic acid, biotin, B12                                                                                                                                                                                                                 |
| Cereal Flakes 6  | Corn Flakes                   | Corn, sugar, salt and corn glucose                                                                                                                                                                                                                                                                                                                       |
| Cereal Flakes 7  | Corn Flakes                   | Corn (98.6%), sugar, salt, dextrose, partially inverted whole sugar syrup, acidity regulator                                                                                                                                                                                                                                                             |
| Cereal Flakes 8  | Corn Flakes                   | Corn, sugar and salt.                                                                                                                                                                                                                                                                                                                                    |
| Cereal Flakes 9  | Corn Flakes                   | Corn 90%, whole cane sugar, rice syrup, sea salt                                                                                                                                                                                                                                                                                                         |
| Cereal Flakes 10 | Cereals, cocoa and honey      | Corn semolina (72%), sugar, honey (2.8%), cocoa (powder), dextrin, salt, vanilla                                                                                                                                                                                                                                                                         |
| Cereal Flakes 11 | Corn Flakes                   | Corn 93.4%, sugar, salt, emulsifier: sunflower lecithin, vitamins: niacin, pantothenic acid, B6, B2, B1, folic acid, biotin and B12                                                                                                                                                                                                                      |
| Cereal Flakes 12 | Choco bubbles                 | Corn flour 63%, sugar, cocoa, vegetable oil, emulsifier: soy lecithin, and flavors                                                                                                                                                                                                                                                                       |
| Cereal Flakes 13 | Honey Balls                   | Corn flour, sugar, honey 3%, sunflower oil, salt                                                                                                                                                                                                                                                                                                         |
| Bread 1          | Rustic bread                  | Corn starch, water, rice flour, sugar, sunflower oil, stabilizers, corn fiber, yeast, salt, raising agent (sodium bicarbonate), emulsifiers, preservative, flavors, antioxidant                                                                                                                                                                          |
| Bread 2          | Breadmaking preparation       | Corn starch, sugar, stabilizer (guar gum and hydroxypropyl methyl cellulose), salt and raising agent (sodium bicarbonate)                                                                                                                                                                                                                                |
| Bread 3          | Breadmaking Mix               | Corn starch, flax seed flour 12%, buckwheat flour 8%, pea bran, rice bran, apple fiber, sugar, thickener: guar gum, salt                                                                                                                                                                                                                                 |
| Bread 4          | Vienés baguette               | Water, corn starch, margarine, water, emulsifier, acidifier, preservative, flavors, food colour, sugar, tapioca starch, rice flour, thickener, yeast, emulsifier, rice fiber, salt, preservative, raising agents, antioxidant, flavors                                                                                                                   |
| Bread 5          | Sliced bread                  | Corn starch, dextrose, thickener, emulsifier, salt, millet flour, raising agent, preservative, antioxidant, bamboo fiber, yeast, sunflower oil, moisturizing and water                                                                                                                                                                                   |
| Bread 6          | Fresh bread                   | Water, corn starch, sourdough, rice starch, cereals, apple fiber, beet syrup, sunflower oil, rice syrup, soy flakes 2.1%, sunflower seeds 2.1%, soy bran 1.9%, flax seeds 1.9%, thickeners, millet flakes 1.4%, soy protein, yeast, sea salt, honey                                                                                                      |
| Bread 7          | Precooked baguettes           | Corn starch 66%, water, sugar, thickener (xanthan gum), emulsifier (monoacetyl and diacetyl tartaric esters of monoglycerides and diglycerides of fatty acids), yeast, salt, preservative (calcium propionate), antioxidant (ascorbic acid), raising agents (disodium diphosphate, sodium bicarbonate)                                                   |
| Bread 8          | Gluten free breadcrumbs       | Corn starch 49%, water, pasteurized liquid egg, sugar, emulsifiers (monoglycerides and diglycerides of fatty acids, monoacetyl and diacetyl tartaric esters of monoglycerides and diglycerides of fatty acids), salt,                                                                                                                                    |

|          |                                          |                                                                                                                                                                                                                                                                                                                                                                                                                                                   |
|----------|------------------------------------------|---------------------------------------------------------------------------------------------------------------------------------------------------------------------------------------------------------------------------------------------------------------------------------------------------------------------------------------------------------------------------------------------------------------------------------------------------|
|          |                                          | thickener (xanthan gum), raising agents (disodium diphosphate, sodium bicarbonate)                                                                                                                                                                                                                                                                                                                                                                |
| Bread 9  | Baguette                                 | Corn starch, sourdough 28% (rice flour, water), water, rice syrup, apple fiber, rice starch, sunflower oil, soy protein, sugar, thickener: hydroxypropyl methyl cellulose, yeast, salt                                                                                                                                                                                                                                                            |
| Bread 10 | Toasts                                   | Corn starch, dextrose, thickener (E-412; E-415; E-466), emulsifier (E-471; E-472e), salt, millet flour, raising agent (E-500ii; E-E-541i; E-341), preservative (E-200), antioxidant (E-300), bamboo fiber, yeast, sunflower oil, moisturizing (glycerol) and water                                                                                                                                                                                |
| Bread 11 | Bread roll                               | Corn starch, vegetable margarine, sugar, salt, water, thickener, emulsifier, raising agent, antioxidant, preservative and yeast.                                                                                                                                                                                                                                                                                                                  |
| Bread 12 | Crispy toasts                            | Corn starch, water, sugar, pasteurized liquid egg, margarine, sunflower oil, water, emulsifier, acidity regulator, preservative, flavors, yeast, thickener, emulsifier, salt, preservative, antioxidant, raising agents                                                                                                                                                                                                                           |
| Pasta 1  | Pasta                                    | Corn flour and water                                                                                                                                                                                                                                                                                                                                                                                                                              |
| Pasta 2  | Rice and corn Penne Pasta                | Rice flour 87.7%, corn flour 12.3%                                                                                                                                                                                                                                                                                                                                                                                                                |
| Pasta 3  | Corn macaroni propellers with vegetables | Corn flour (55%), rice flour (41.5%), quinoa flour (3%), emulsifier E-471 (mono and diglycerides of fatty acids). Pasta with tomato: corn flour (53.5%), rice flour (39.5%), tomato concentrate (5%), quinoa flour (2%), emulsifier E-471 (mono and diglycerides of fatty acids). Pasta with spinach: corn flour (54.5%), rice flour (41%), quinoa flour (2.5%), dehydrated spinach (2%), emulsifier E-471 (mono and diglycerides of fatty acids) |
| Pasta 4  | Pasta for Kids                           | Corn flour and water                                                                                                                                                                                                                                                                                                                                                                                                                              |
| Pasta 5  | Penne                                    | Corn flour, millet flour, rice flour, sugar cane syrup                                                                                                                                                                                                                                                                                                                                                                                            |
| Pasta 6  | Rice noodles                             | Rice flour and corn starch                                                                                                                                                                                                                                                                                                                                                                                                                        |
| Pasta 7  | Corn and Rice Pasta shapes               | Corn flour 79.2%, rice flour 19.8%, soy lecithin                                                                                                                                                                                                                                                                                                                                                                                                  |
| Pasta 8  | Lasagne mini sheets                      | Rice flour 87.3%, corn flour 12.7%                                                                                                                                                                                                                                                                                                                                                                                                                |
| Pasta 9  | Pasta all uovo                           | Corn starch, eggs 23%, rice flour, corn flour, emulsifier (E471), thickener (guar gum)                                                                                                                                                                                                                                                                                                                                                            |
| Pasta 10 | Whole rice macaroni                      | Whole rice flour* (98%), thickener: xanthan gum. *From organic farming                                                                                                                                                                                                                                                                                                                                                                            |
| Pasta 11 | Rigatoni                                 | Corn starch, pre-treated corn flour, rice flour, rice starch, pea proteins (5%), lupine flour (2%), emulsifier: mono and diglycerides of fatty acids                                                                                                                                                                                                                                                                                              |
| Pasta 12 | Meat cannelloni                          | Dough 55%, corn starch, egg powder, glucose syrup, sugar, stabilizers, salt and water + meat filling                                                                                                                                                                                                                                                                                                                                              |

---
